# Supplementary material
Source: PubMed Central journal article supplement (PMC4937734)
Supplement: ajcr0006-1302-f6.pdf [file ajcr0006-1302-f6.pdf]

## BMPR2-pSmad1/5-RUNX2 associated with DDCS progression

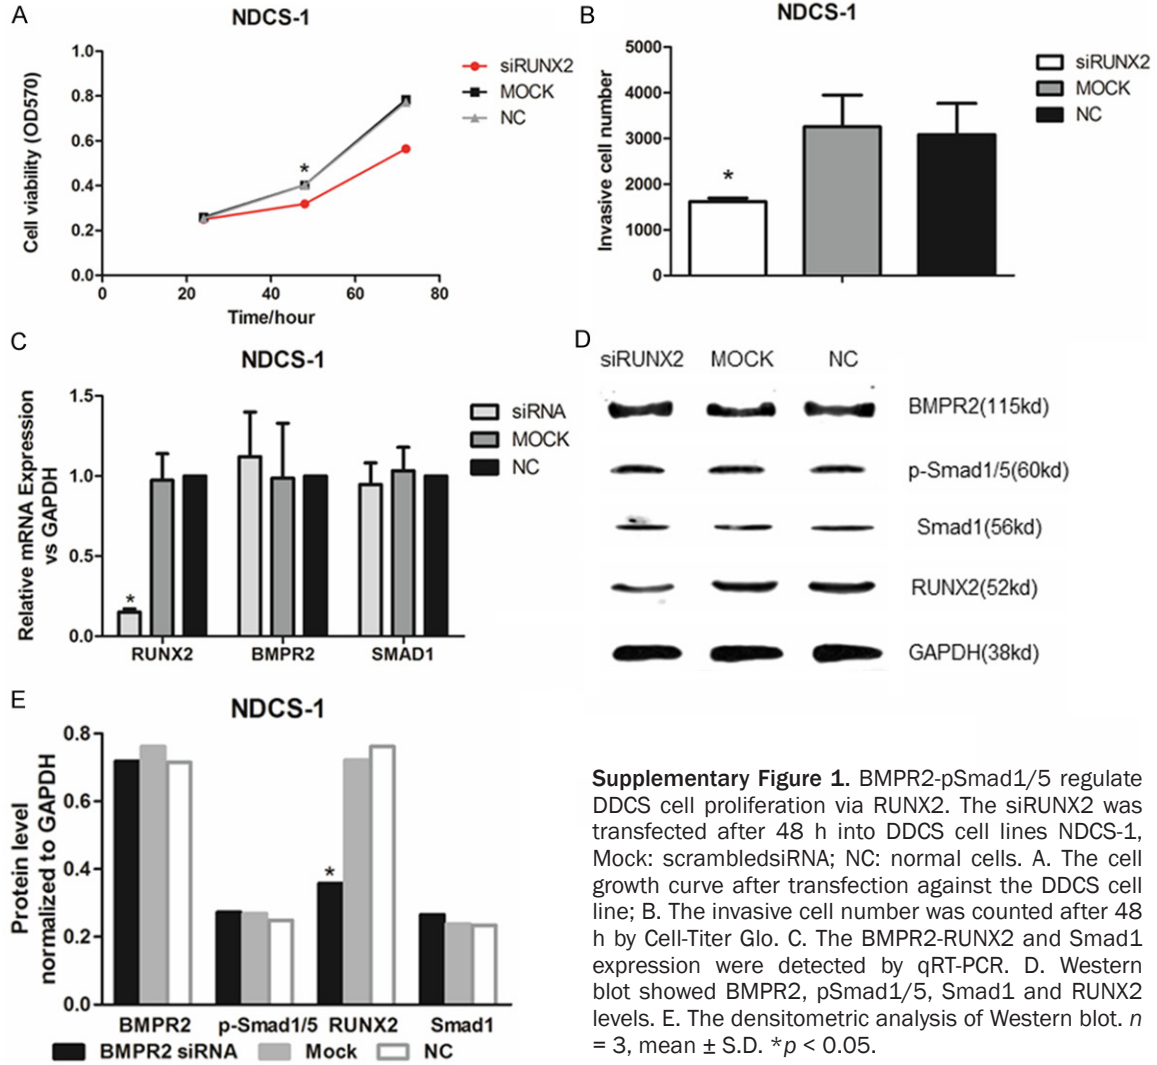

**Supplementary Figure 1.** BMPR2-pSmad1/5 regulate DDCS cell proliferation via RUNX2. The siRUNX2 was transfected after 48 h into DDCS cell lines NDCS-1, Mock: scrambledsiRNA; NC: normal cells. A. The cell growth curve after transfection against the DDCS cell line; B. The invasive cell number was counted after 48 h by Cell-Titer Glo. C. The BMPR2-RUNX2 and Smad1 expression were detected by qRT-PCR. D. Western blot showed BMPR2, pSmad1/5, Smad1 and RUNX2 levels. E. The densitometric analysis of Western blot.  $n = 3$ , mean  $\pm$  S.D.  $*p < 0.05$ .
